# Supplementary material for: The Multicommodity-Ring Location Routing Problem
Source: Atypon-hosted journal article supplement (doi:10.1287/trsc.2015.0600), 2015-07-28
Supplement: trsc.2015.0600-sm_appendices_bc.pdf [file trsc.2015.0600-sm_appendices_bc.pdf]

## B. Generation of MRLRP instances from benchmark CLRP ones

As previously recalled, in Prins et al. (2006), the benchmark names follow the pattern  $n$ - $m$ - $c$ [b], with  $n$  being the number of customers,  $m$  the number of depots and  $c$  the number of clusters into which customers are grouped; the final 'b' denotes  $q = 150$ , otherwise  $q = 70$ . The demands of the  $n$  customers are integer and are uniformly distributed in  $[11,20]$ , while the depot capacities ensure at least 2 depots are opened. As in the original paper, the second-level route costs are obtained starting from Euclidean distances multiplied by 100 and rounded up to the nearest integer. MRLRP features have been added as follows. We will denote as  $i = i_{\text{rnd}}(i_a, i_b)$  the function to uniformly pick a random value out of a range of integers.

### B.1. UDCs and demands

UDCs and demands are generated from the original benchmark: nevertheless, some processing is needed to adapt the original benchmark graph to the MRLRP features.

**B.1.1. Location of points** UDC are initially located according to the depot points of the original benchmark instance and given the same capacities and fixed costs. Then, to create the *city context* that is peculiar to the MRLRP, we need the UDCs to be located in such a way as to surround all, or at least the great majority, of the customers, i.e. the demands' locations. To achieve this, we first take the convex hull  $H_0$  of depot and customer points in the original benchmark; then, we eventually exchange some depot and clients locations, in order to have all the depots located on vertices of  $H_0$ ; finally, we shift the depots along the perimeter of  $H_0$  to maximize the area of the convex polygon described by the depots only.

**B.1.2.  $D$  and  $P$  and additional demands** In most of the instances, the original CLRP customers give rise directly to the MRLRP demands  $D$  and  $P$ : the former are randomly inserted into the latter in such a way as to have  $|D| = |P|$ . However, an augmentation of the demands with respect to the initial (CLRP) ones may be necessary. To achieve this, we generate a *second demand* for some of the existing points in the graph – instead of generating new points. The second demand has quantity  $q = i_{\text{rnd}}(11, 20)$ , i.e. like those in the original benchmark, and may be of the same type (delivery, pick-up) or not. However, new demands are generated in such a way as to preserve  $|D| = |P|$ . Since the overall demand is greater than that of the original CLRP instance, which we denote by  $Q_{\text{tot}}$ , we increase the capacity of each UDC by a factor  $\frac{\sum_{i \in D \cup P} q_i}{Q_{\text{tot}}}$  and finally round it up; then, we do the same for the fixed costs, to preserve the cost/capacity ratio.

**B.1.3. Additional UDCs** We generate possible additional UDCs (as required for scenario 2 of each collection) in the ring between  $H_0$  and the polygon that is similar to  $H_0$ , has the same centroid and an area that is 85% of that of  $H_0$ . By doing so, the newly generated points are in the peripheral region of the *city*. The capacity of the new UDCs is generated as  $i_{\text{rnd}}(\lceil 0.8 \cdot Q_U^{\text{avg}} \rceil, \lfloor Q_U^{\text{avg}} \rfloor)$ ,  $Q_U^{\text{avg}}$  being the average capacity of the initial UDCs, whereas the fixed cost is obtained by multiplying the capacity by the average cost/capacity ratio of the initial UDCs.

**B.1.4. Tightness of the UDC capacities and minimal number of UDCs needed**

Once the UDCs and demands have been obtained in this way, we need to ensure that  $\max_{u,v \in U, u \neq v} (Q_u + Q_v) < \sum_{i \in D \cup P} q_i \leq \frac{1}{f_q} \sum_{u \in U} Q_u$ . The left inequality ensures that at least three UDCs will be needed, whereas the right one prevents an instance from being too tight, as  $f_q \cdot \sum_{i \in D \cup P} q_i$  is an estimation of the total occupation of the UDC capacity due to the demand allocation on both the first and the second level; as for  $f_q$ , its value must be comprised in  $[1, 2]$ , with  $f_q = 1$  and  $f_q = 2$  representing the two extreme cases of, respectively, all direct and all indirect shipments; we always choose  $f_q = 2$ . If necessary, we alternate two steps as long as required for both the above inequalities to be verified: a) we iteratively increment each demand by 1 load unit until the left inequality is verified; b) we iteratively increment by 1 the capacity of each UDC but the greatest one, without exceeding it, until the right inequality is satisfied.

**B.2. Gates and SPLs**

Table 13 shows how many gates and SPLs have been generated, according to the values of  $n$  and  $m$  in the original CLRP benchmark instance. The value between parentheses is the

| $n$ | $m$ | $ K $ | $ L $  |
|-----|-----|-------|--------|
| 20  | 5   | 5(10) | 5(10)  |
| 50  | 5   | 5(10) | 5(10)  |
| 100 | 5   | 5(10) | 10(15) |
| 100 | 10  | 5(10) | 10(15) |

**Table 13** Number of gates and SPL in the generated MRLRP instances.

maximal value, i.e. the one in the corresponding scenario of a collection that considers an augmented number of gates or SPLs. To locate both gates and SPLs, we take the convex hull  $H_0$  and we enlarge it by an extension factor  $f > 1$  to obtain the polygon  $H(f)$  according to the extension principle shown in figure 5;  $n_{H_0}$ ,  $p_{H_0}$  and  $A_{H_0}$  are the number of vertices, the perimeter and the area of  $H_0$ , respectively. Then, the SPL positions are randomly generated inside  $H(1.1)$  in such a way as to have a distance greater than or equal to  $0.3 \frac{p_{H_0}}{n_{H_0}}$  from any

UDCs and any other SPLs, while the positions of the gates are randomly generated in the ring between  $H(1.2)$  and  $H(1.6)$  in such a way as to be uniformly distributed all around  $H_0$ .

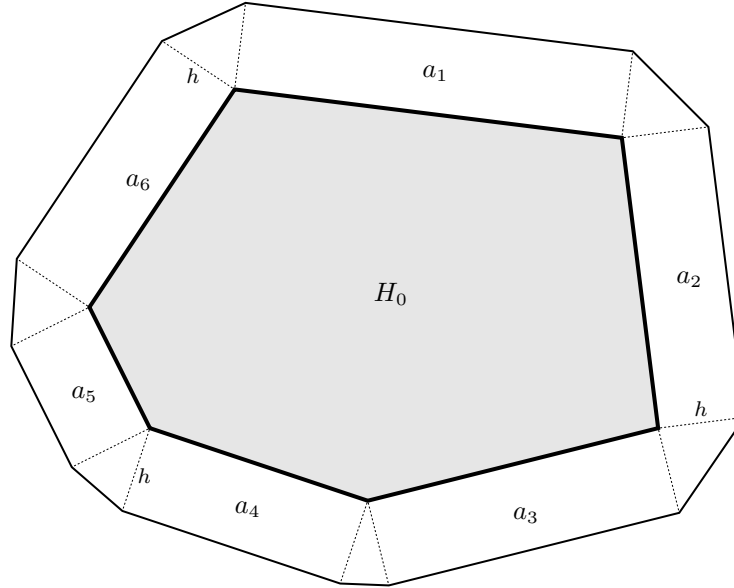

**Figure 5** Polygon  $H(f)$  obtained by extension of the convex polygon  $H_0$  according to the extension factor  $f > 1$ : height  $h$  is chosen so to have  $\sum_i a_i = h \cdot p_{H_0}$  equal to  $(f - 1) \cdot A_{H_0}$ .

### B.3. Second-level vehicle features

For  $q$  the value of the original benchmark instance is taken, whereas for  $M$  we choose  $M = 50$  when  $q = 70$ , and  $M = 65$  when  $q = 150$ , except for collection galwc04, in which  $q = 70$  and  $M = 60$ .

### B.4. Budget constraint and maximum number of UDCs a gate can address

Regarding the budget constraint, it is always relaxed by fixing  $N = |U|$ , as it has already been said in 6.1.1. The constant  $B$  has always been given the value 2.

### B.5. Demands and their assignment to gates

We randomly choose  $2|K|$  demands in  $D \cup P$  to assure that each gate is assigned at least two demands: the remaining  $|D| + |P| - 2|K|$  are randomly assigned. When a second demand needs to be generated for a customer point in the graph, and has the same type as the first one, it is guaranteed not to be associated with the same gate as the first one.

### B.6. First-level arc features

The flow transportation costs  $c_{ku}$  and  $c_{uk}$  are both obtained by multiplying the distance between gate  $k$  and UDC  $u$  by  $c_{PU}^* = 2.5$ , whereas for  $c_{uv}$ ,  $u, v \in U$ , we multiply the distance between  $u$  and  $v$  by  $c_{ring}^* = 0.5$ ; both constants  $c_{PU}^*$  and  $c_{ring}^*$  are costs per length unit

and per load unit. Regarding ring construction costs, we suppose that there is a subset  $U^* \subset U$  of UDCs which are more expensive to connect in the ring: UDCs in  $U^*$  are picked randomly, and  $|U^*| = 1$  or  $|U^*| = 2$ , depending on whether the base scenario has  $|U| = 5$  or  $|U| = 10$ . Cost  $g_{uv}$ ,  $u, v \in U, u < v$  is obtained by multiplying the distance between  $u$  and  $v$  by the cost per length unit  $g_{uv}^*$ , with  $g_{uv}^* = 50$  if neither of  $u$  and  $v$  is in  $U^*$ , or  $g_{uv}^* = i_{\text{rnd}}(50, 100)$  otherwise. If needed, the ring construction costs generated in this way are adjusted to guarantee that the triangular inequality is always verified. Finally, capacity  $q_{uv}$ ,  $u, v \in U$ , is obtained:

$$q_{uv} = \max \left( Q_u, \left( \frac{1}{2} \cdot i_{\text{rnd}}(\lceil 0.8 \cdot Q_u \rceil, \lfloor 1.1 \cdot Q_u \rfloor) + \frac{1}{2} \cdot i_{\text{rnd}}(\lceil 0.8 \cdot \sum_{i \in D \cup P} q_i \rceil, \lfloor 1.1 \cdot \sum_{i \in D \cup P} q_i \rfloor) \right) \right)$$

Costs  $c_{uv}$  and  $g_{uv}$  described so far represent the low levels of ring transportation and installation costs, i.e. the ones of instances of type L|L; for the high level of both types of costs, we multiply the corresponding low-level cost by 5.

### B.7. Fleet balance bounds

For each  $u \in U$ , we estimate the number of vehicles needed as

$$\nu_u = \lceil \sum_{i \in D \cup P} q_i \cdot \frac{Q_u}{\sum_{v \in U} Q_v} \frac{|U|}{N} \frac{1}{q} \rceil + 1$$

to take into account both the budget constraint and the capacity  $q$  of second-level vehicles; then, we randomly choose both  $\delta_u^-$  and  $\delta_u^+$  as  $i_{\text{rnd}}(0, \lfloor \frac{\nu_u}{2} \rfloor)$ ; if  $\lfloor \frac{\nu_u}{2} \rfloor = 0$ , we randomly choose  $\{\delta_u^-, \delta_u^+\}$  in  $\{\{1, 0\}, \{0, 1\}, \{1, 1\}\}$ . For each SPL  $l$ , we randomly choose both  $\delta_l^-$  and  $\delta_l^+$  as  $i_{\text{rnd}}(0, \max_{u \in U} \lfloor \frac{\nu_u}{2} \rfloor)$ ; if  $\max_{u \in U} \lfloor \frac{\nu_u}{2} \rfloor = 0$ , we randomly choose also  $\{\delta_l^-, \delta_l^+\}$  in  $\{\{1, 0\}, \{0, 1\}, \{1, 1\}\}$ .

## C. Complete Results

In the following the reader will find the tables with all the results of the conducted experimental sessions.

| Instance      | Features |    |    |    |    |     |    | Exact(X) |      |       |       | GALW |     |     |      |      |      | Hybrid(Y) |     |      |
|---------------|----------|----|----|----|----|-----|----|----------|------|-------|-------|------|-----|-----|------|------|------|-----------|-----|------|
|               | K        | U  | L  | D  | N  | q   | M  | %r       | r    | T/%   | #ps   | %X   | s   | r   | a/%  | t    | #ps  | %Y        | %X  | T/%  |
| galwc01-0-L L | 5        | 5  | 5  | 15 | 5  | 70  | 50 | 3.5      | 9.6  | 24.8  | 21503 | 2.1  | 0.0 | 0.4 | 2.9  | 3.6  | 3122 | 0.0       | 2.1 | 3.6  |
| galwc01-0-L H | 5        | 5  | 5  | 15 | 5  | 70  | 50 | 5.0      | 9.5  | 30.8  | 21503 | 4.9  | 0.0 | 0.4 | 4.2  | 4.9  | 3121 | 0.6       | 4.3 | 4.9  |
| galwc01-0-H L | 5        | 5  | 5  | 15 | 5  | 70  | 50 | 6.5      | 9.6  | 16.3  | 21503 | 6.2  | 0.0 | 0.4 | 3.0  | 3.7  | 2926 | 4.6       | 1.7 | 2.4  |
| galwc01-0-H H | 5        | 5  | 5  | 15 | 5  | 70  | 50 | 9.6      | 9.6  | 15.4  | 21503 | 9.3  | 0.0 | 0.4 | 7.4  | 8.1  | 3021 | 5.8       | 3.7 | 2.9  |
| galwc01-1-L L | 5        | 5  | 5  | 20 | 5  | 70  | 50 | 3.3      | 14.0 | 48.7  | 37839 | 3.3  | 0.0 | 0.7 | 4.2  | 5.2  | 4033 | 0.1       | 3.2 | 4.8  |
| galwc01-1-L H | 5        | 5  | 5  | 20 | 5  | 70  | 50 | 5.9      | 14.2 | 169.9 | 37839 | 4.8  | 0.0 | 0.7 | 8.9  | 9.8  | 4039 | 0.5       | 4.3 | 9.4  |
| galwc01-1-H L | 5        | 5  | 5  | 20 | 5  | 70  | 50 | 7.2      | 14.1 | 80.7  | 37839 | 2.8  | 0.0 | 0.7 | 4.3  | 5.3  | 4140 | 0.0       | 2.8 | 5.0  |
| galwc01-1-H H | 5        | 5  | 5  | 20 | 5  | 70  | 50 | 10.3     | 14.0 | 109.7 | 37839 | 5.0  | 0.0 | 0.7 | 3.8  | 4.8  | 4223 | 1.3       | 3.7 | 6.1  |
| galwc01-2-L L | 5        | 10 | 5  | 15 | 10 | 70  | 50 | 4.5      | 24.9 | 642.5 | 64737 | 6.2  | 1.1 | 0.4 | 28.5 | 29.2 | 8388 | 2.4       | 3.9 | 37.3 |
| galwc01-2-L H | 5        | 10 | 5  | 15 | 10 | 70  | 50 | 7.4      | 25.4 | 442.0 | 64737 | 5.1  | 1.1 | 0.4 | 31.0 | 31.7 | 8489 | 0.5       | 4.7 | 39.8 |
| galwc01-2-H L | 5        | 10 | 5  | 15 | 10 | 70  | 50 | 9.0      | 25.4 | 320.5 | 64737 | 5.0  | 1.1 | 0.4 | 39.4 | 40.1 | 8630 | 0.3       | 4.7 | 33.6 |
| galwc01-2-H H | 5        | 10 | 5  | 15 | 10 | 70  | 50 | 12.3     | 25.2 | 419.1 | 64737 | 8.3  | 1.3 | 0.4 | 64.2 | 65.0 | 8665 | 3.8       | 4.7 | 30.7 |
| galwc01-3-L L | 10       | 5  | 5  | 15 | 5  | 70  | 50 | 4.7      | 9.6  | 16.8  | 21503 | 3.8  | 0.0 | 0.4 | 4.0  | 4.7  | 3068 | 2.5       | 1.4 | 2.3  |
| galwc01-3-L H | 10       | 5  | 5  | 15 | 5  | 70  | 50 | 7.6      | 9.5  | 24.9  | 21503 | 3.8  | 0.0 | 0.4 | 2.8  | 3.5  | 3025 | 2.4       | 1.5 | 3.6  |
| galwc01-3-H L | 10       | 5  | 5  | 15 | 5  | 70  | 50 | 8.3      | 9.6  | 10.2  | 21503 | 4.8  | 0.0 | 0.4 | 2.8  | 3.6  | 3067 | 3.7       | 1.1 | 1.8  |
| galwc01-3-H H | 10       | 5  | 5  | 15 | 5  | 70  | 50 | 12.2     | 9.6  | 20.3  | 21503 | 5.9  | 0.0 | 0.4 | 3.5  | 4.2  | 3143 | 4.7       | 1.2 | 2.5  |
| galwc01-4-L L | 5        | 5  | 10 | 15 | 5  | 70  | 50 | 4.4      | 13.6 | 31.0  | 31503 | 2.5  | 0.0 | 0.4 | 4.2  | 5.0  | 4348 | 0.0       | 2.5 | 2.7  |
| galwc01-4-L H | 5        | 5  | 10 | 15 | 5  | 70  | 50 | 8.6      | 13.7 | 69.8  | 31503 | 4.6  | 0.0 | 0.4 | 6.0  | 6.7  | 4309 | 0.9       | 3.7 | 3.6  |
| galwc01-4-H L | 5        | 5  | 10 | 15 | 5  | 70  | 50 | 8.9      | 13.7 | 29.3  | 31503 | 4.0  | 0.0 | 0.4 | 5.8  | 6.5  | 4313 | 2.2       | 1.9 | 2.7  |
| galwc01-4-H H | 5        | 5  | 10 | 15 | 5  | 70  | 50 | 13.0     | 14.1 | 53.4  | 31503 | 5.8  | 0.0 | 0.4 | 5.1  | 5.8  | 4158 | 2.4       | 3.5 | 3.2  |
| galwc02-0-L L | 5        | 5  | 5  | 15 | 5  | 70  | 50 | 5.7      | 3.0  | 8.0   | 14066 | 1.4  | 0.0 | 0.3 | 1.6  | 2.2  | 2319 | 0.0       | 1.4 | 1.6  |
| galwc02-0-L H | 5        | 5  | 5  | 15 | 5  | 70  | 50 | 10.0     | 3.0  | 10.3  | 14066 | 5.9  | 0.0 | 0.3 | 2.3  | 3.0  | 2418 | 1.3       | 4.6 | 2.0  |
| galwc02-0-H L | 5        | 5  | 5  | 15 | 5  | 70  | 50 | 5.8      | 3.0  | 9.5   | 14066 | 1.7  | 0.0 | 0.3 | 2.3  | 2.9  | 2352 | 0.0       | 1.7 | 1.9  |
| galwc02-0-H H | 5        | 5  | 5  | 15 | 5  | 70  | 50 | 7.4      | 3.0  | 4.0   | 14066 | 4.7  | 0.0 | 0.3 | 2.4  | 3.1  | 2421 | 0.2       | 4.5 | 1.7  |
| galwc02-1-L L | 5        | 5  | 5  | 20 | 5  | 70  | 50 | 6.0      | 9.0  | 13.3  | 33616 | 0.9  | 0.0 | 0.6 | 2.4  | 3.4  | 3253 | 0.1       | 0.8 | 1.9  |
| galwc02-1-L H | 5        | 5  | 5  | 20 | 5  | 70  | 50 | 10.4     | 9.2  | 189.8 | 33616 | 2.5  | 0.0 | 0.7 | 2.4  | 3.4  | 3303 | 1.2       | 1.3 | 3.2  |
| galwc02-1-H L | 5        | 5  | 5  | 20 | 5  | 70  | 50 | 7.0      | 9.1  | 32.8  | 33616 | 3.1  | 0.0 | 0.7 | 2.2  | 3.2  | 3209 | 0.0       | 3.1 | 2.8  |
| galwc02-1-H H | 5        | 5  | 5  | 20 | 5  | 70  | 50 | 9.0      | 9.1  | 430.5 | 33616 | 3.1  | 0.0 | 0.6 | 2.9  | 3.8  | 3195 | 0.5       | 2.6 | 3.9  |
| galwc02-2-L L | 5        | 10 | 5  | 15 | 10 | 70  | 50 | 5.0      | 7.6  | 59.7  | 39438 | 3.6  | 1.1 | 0.3 | 4.7  | 5.3  | 4707 | 0.1       | 3.5 | 7.5  |
| galwc02-2-L H | 5        | 10 | 5  | 15 | 10 | 70  | 50 | 8.7      | 7.7  | 78.7  | 39438 | 4.0  | 1.7 | 0.3 | 4.2  | 4.8  | 4667 | 2.5       | 1.5 | 11.0 |
| galwc02-2-H L | 5        | 10 | 5  | 15 | 10 | 70  | 50 | 10.9     | 7.6  | 61.5  | 39438 | 0.2  | 1.1 | 0.3 | 5.5  | 6.1  | 4676 | 0.0       | 0.2 | 5.7  |
| galwc02-2-H H | 5        | 10 | 5  | 15 | 10 | 70  | 50 | 14.6     | 7.6  | 80.8  | 39438 | 6.4  | 2.1 | 0.3 | 4.3  | 4.9  | 5012 | 2.8       | 3.8 | 17.7 |
| galwc02-3-L L | 10       | 5  | 5  | 15 | 5  | 70  | 50 | 3.2      | 3.1  | 2.8   | 14066 | 0.3  | 0.0 | 0.3 | 2.1  | 2.7  | 2324 | 0.1       | 0.2 | 1.4  |
| galwc02-3-L H | 10       | 5  | 5  | 15 | 5  | 70  | 50 | 9.6      | 3.1  | 8.7   | 14066 | 2.3  | 0.0 | 0.3 | 1.9  | 2.6  | 2347 | 2.1       | 0.2 | 1.7  |
| galwc02-3-H L | 10       | 5  | 5  | 15 | 5  | 70  | 50 | 3.2      | 3.0  | 4.2   | 14066 | 1.8  | 0.0 | 0.3 | 2.3  | 3.0  | 2440 | 0.2       | 1.6 | 1.6  |
| galwc02-3-H H | 10       | 5  | 5  | 15 | 5  | 70  | 50 | 7.7      | 3.0  | 4.8   | 14066 | 2.7  | 0.0 | 0.3 | 2.5  | 3.1  | 2322 | 1.1       | 1.6 | 1.9  |
| galwc02-4-L L | 5        | 5  | 10 | 15 | 5  | 70  | 50 | 6.3      | 5.2  | 8.0   | 23190 | 0.2  | 0.0 | 0.3 | 2.4  | 3.1  | 3478 | 0.0       | 0.2 | 2.0  |
| galwc02-4-L H | 5        | 5  | 10 | 15 | 5  | 70  | 50 | 12.3     | 5.2  | 18.0  | 23190 | 3.2  | 0.0 | 0.3 | 2.2  | 2.8  | 3419 | 1.0       | 2.3 | 2.1  |
| galwc02-4-H L | 5        | 5  | 10 | 15 | 5  | 70  | 50 | 6.1      | 5.2  | 6.4   | 23190 | 1.6  | 0.0 | 0.3 | 3.6  | 4.3  | 3547 | 0.0       | 1.6 | 2.5  |
| galwc02-4-H H | 5        | 5  | 10 | 15 | 5  | 70  | 50 | 7.9      | 5.2  | 12.6  | 23190 | 4.6  | 0.0 | 0.3 | 2.5  | 3.2  | 3375 | 0.4       | 4.2 | 2.6  |
| galwc03-0-L L | 5        | 5  | 5  | 15 | 5  | 150 | 65 | 18.6     | 6.6  | 10.8  | 18761 | 2.1  | 0.0 | 0.5 | 1.9  | 2.7  | 2082 | 0.0       | 2.1 | 2.2  |
| galwc03-0-L H | 5        | 5  | 5  | 15 | 5  | 150 | 65 | 16.6     | 6.6  | 23.6  | 18761 | 6.3  | 0.0 | 0.5 | 4.9  | 5.7  | 2099 | 1.5       | 4.8 | 2.5  |
| galwc03-0-H L | 5        | 5  | 5  | 15 | 5  | 150 | 65 | 26.5     | 6.6  | 20.2  | 18761 | 6.6  | 0.0 | 0.5 | 1.9  | 2.7  | 2012 | 1.2       | 5.4 | 1.8  |
| galwc03-0-H H | 5        | 5  | 5  | 15 | 5  | 150 | 65 | 25.3     | 6.6  | 23.5  | 18761 | 6.9  | 0.0 | 0.5 | 5.0  | 5.8  | 2129 | 2.4       | 4.6 | 2.2  |
| galwc03-1-L L | 5        | 5  | 5  | 20 | 5  | 150 | 65 | 16.0     | 51.3 | 113.8 | 68987 | 3.7  | 0.0 | 1.2 | 2.5  | 4.0  | 3513 | 1.5       | 2.2 | 3.8  |
| galwc03-1-L H | 5        | 5  | 5  | 20 | 5  | 150 | 65 | 18.3     | 51.8 | 149.9 | 68987 | 7.4  | 0.0 | 1.1 | 9.2  | 10.6 | 3488 | 3.4       | 4.1 | 4.1  |
| galwc03-1-H L | 5        | 5  | 5  | 20 | 5  | 150 | 65 | 23.9     | 51.8 | 131.6 | 68987 | 2.8  | 0.0 | 1.2 | 2.8  | 4.3  | 3476 | 0.0       | 2.8 | 3.7  |
| galwc03-1-H H | 5        | 5  | 5  | 20 | 5  | 150 | 65 | 25.6     | 51.2 | 230.1 | 68987 | 7.0  | 0.0 | 1.1 | 4.2  | 5.6  | 3399 | 4.2       | 3.0 | 3.5  |
| galwc03-2-L L | 5        | 10 | 5  | 15 | 10 | 150 | 65 | 19.2     | 24.1 | 181.9 | 79140 | 0.6  | 2.0 | 0.6 | 26.2 | 27.1 | 8449 | 0.0       | 0.6 | 13.7 |
| galwc03-2-L H | 5        | 10 | 5  | 15 | 10 | 150 | 65 | 18.7     | 24.2 | 117.6 | 79140 | 0.8  | 1.1 | 0.6 | 25.7 | 26.6 | 8550 | 0.1       | 0.7 | 11.4 |
| galwc03-2-H L | 5        | 10 | 5  | 15 | 10 | 150 | 65 | 20.9     | 24.2 | 151.1 | 79140 | 0.6  | 1.1 | 0.6 | 33.6 | 34.5 | 7849 | 0.0       | 0.6 | 11.5 |
| galwc03-2-H H | 5        | 10 | 5  | 15 | 10 | 150 | 65 | 23.2     | 24.3 | 130.8 | 79140 | 5.6  | 1.7 | 0.6 | 39.6 | 40.5 | 8348 | 5.0       | 0.6 | 13.2 |
| galwc03-3-L L | 10       | 5  | 5  | 15 | 5  | 150 | 65 | 18.6     | 6.7  | 11.3  | 18761 | 2.7  | 0.0 | 0.5 | 1.7  | 2.5  | 2085 | 0.0       | 2.7 | 1.8  |
| galwc03-3-L H | 10       | 5  | 5  | 15 | 5  | 150 | 65 | 13.3     | 6.7  | 16.3  | 18761 | 4.3  | 0.0 | 0.5 | 1.9  | 2.7  | 2127 | 1.9       | 2.4 | 2.5  |
| galwc03-3-H L | 10       | 5  | 5  | 15 | 5  | 150 | 65 | 24.1     | 6.6  | 14.2  | 18761 | 6.0  | 0.0 | 0.5 | 4.1  | 5.0  | 2183 | 3.9       | 2.3 | 1.9  |
| galwc03-3-H H | 10       | 5  | 5  | 15 | 5  | 150 | 65 | 22.6     | 6.7  | 16.0  | 18761 | 4.5  | 0.0 | 0.5 | 3.7  | 4.5  | 2084 | 1.9       | 2.7 | 2.5  |
| galwc03-4-L L | 5        | 5  | 10 | 15 | 5  | 150 | 65 | 18.1     | 11.0 | 22.7  | 31590 | 1.9  | 0.0 | 0.5 | 2.4  | 3.2  | 3319 | 0.0       | 1.9 | 2.7  |
| galwc03-4-L H | 5        | 5  | 10 | 15 | 5  | 150 | 65 | 16.3     | 11.0 | 20.0  | 31590 | 3.9  | 0.0 | 0.5 | 6.2  | 7.0  | 3223 | 0.9       | 3.0 | 3.1  |
| galwc03-4-H L | 5        | 5  | 10 | 15 | 5  | 150 | 65 | 26.7     | 11.0 | 29.4  | 31590 | 4.0  | 0.0 | 0.5 | 6.4  | 7.2  | 3287 | 1.4       | 2.7 | 2.3  |
| galwc03-4-H H | 5        | 5  | 10 | 15 | 5  | 150 | 65 | 28.1     | 11.2 | 32.7  | 31590 | 3.6  | 0.0 | 0.5 | 9.5  | 10.3 | 3237 | 2.5       | 1.1 | 3.1  |

Table 14 Result of the three methods on all the instances of collections galwc01, galwc02 and galwc03.

| Instance      | Features |    |    |    |    |     |    | GALW |     |      |      |       |     | Hybrid(Y)<br>T/% |
|---------------|----------|----|----|----|----|-----|----|------|-----|------|------|-------|-----|------------------|
|               | K        | U  | L  | D  | N  | q   | M  | s    | r   | a/%  | t    | #ps   | %Y  |                  |
| galwc04-0-L L | 5        | 5  | 5  | 25 | 5  | 70  | 60 | 0.0  | 1.7 | 2.0  | 4.0  | 3180  | 3.0 | 3.9              |
| galwc04-0-L H | 5        | 5  | 5  | 25 | 5  | 70  | 60 | 0.0  | 1.6 | 2.4  | 4.3  | 3107  | 8.7 | 5.5              |
| galwc04-0-H L | 5        | 5  | 5  | 25 | 5  | 70  | 60 | 0.0  | 1.7 | 3.7  | 5.7  | 3135  | 0.1 | 4.0              |
| galwc04-0-H H | 5        | 5  | 5  | 25 | 5  | 70  | 60 | 0.0  | 1.6 | 3.5  | 5.5  | 3092  | 2.5 | 5.5              |
| galwc04-1-L L | 5        | 5  | 5  | 40 | 5  | 70  | 60 | 0.0  | 4.0 | 5.7  | 10.0 | 7376  | 2.0 | 8.3              |
| galwc04-1-L H | 5        | 5  | 5  | 40 | 5  | 70  | 60 | 0.0  | 4.0 | 9.2  | 13.6 | 7395  | 6.4 | 12.5             |
| galwc04-1-H L | 5        | 5  | 5  | 40 | 5  | 70  | 60 | 0.0  | 4.0 | 12.3 | 16.7 | 7558  | 3.4 | 13.1             |
| galwc04-1-H H | 5        | 5  | 5  | 40 | 5  | 70  | 60 | 0.0  | 4.4 | 11.7 | 16.4 | 7580  | 1.1 | 15.4             |
| galwc04-2-L L | 5        | 10 | 5  | 25 | 10 | 70  | 60 | 1.1  | 1.4 | 11.0 | 12.7 | 9428  | 1.4 | 33.2             |
| galwc04-2-L H | 5        | 10 | 5  | 25 | 10 | 70  | 60 | 1.2  | 1.4 | 15.3 | 17.0 | 9679  | 4.6 | 29.0             |
| galwc04-2-H L | 5        | 10 | 5  | 25 | 10 | 70  | 60 | 1.1  | 1.4 | 17.0 | 18.7 | 9389  | 0.2 | 33.7             |
| galwc04-2-H H | 5        | 10 | 5  | 25 | 10 | 70  | 60 | 1.3  | 1.4 | 26.6 | 28.3 | 9359  | 4.7 | 24.3             |
| galwc04-3-L L | 10       | 5  | 5  | 25 | 5  | 70  | 60 | 0.0  | 1.7 | 2.4  | 4.4  | 3155  | 1.1 | 4.1              |
| galwc04-3-L H | 10       | 5  | 5  | 25 | 5  | 70  | 60 | 0.0  | 1.6 | 3.3  | 5.3  | 3134  | 8.6 | 5.7              |
| galwc04-3-H L | 10       | 5  | 5  | 25 | 5  | 70  | 60 | 0.0  | 1.6 | 4.3  | 6.3  | 3111  | 0.0 | 4.2              |
| galwc04-3-H H | 10       | 5  | 5  | 25 | 5  | 70  | 60 | 0.0  | 1.6 | 5.7  | 7.7  | 3165  | 1.6 | 5.7              |
| galwc04-4-L L | 5        | 5  | 10 | 25 | 5  | 70  | 60 | 0.0  | 1.5 | 2.8  | 4.7  | 4448  | 0.6 | 4.2              |
| galwc04-4-L H | 5        | 5  | 10 | 25 | 5  | 70  | 60 | 0.0  | 1.4 | 3.2  | 4.9  | 4260  | 8.0 | 6.1              |
| galwc04-4-H L | 5        | 5  | 10 | 25 | 5  | 70  | 60 | 0.0  | 1.4 | 4.2  | 5.9  | 4401  | 0.0 | 3.7              |
| galwc04-4-H H | 5        | 5  | 10 | 25 | 5  | 70  | 60 | 0.0  | 1.4 | 4.1  | 5.8  | 4472  | 1.1 | 5.0              |
| galwc05-0-L L | 5        | 5  | 5  | 25 | 5  | 150 | 65 | 0.0  | 2.6 | 6.0  | 8.9  | 4791  | 0.7 | 7.4              |
| galwc05-0-L H | 5        | 5  | 5  | 25 | 5  | 150 | 65 | 0.0  | 2.7 | 7.3  | 10.3 | 4880  | 0.1 | 7.1              |
| galwc05-0-H L | 5        | 5  | 5  | 25 | 5  | 150 | 65 | 0.0  | 2.6 | 8.1  | 11.0 | 4813  | 0.2 | 7.8              |
| galwc05-0-H H | 5        | 5  | 5  | 25 | 5  | 150 | 65 | 0.0  | 2.6 | 8.0  | 10.9 | 4839  | 0.1 | 9.6              |
| galwc05-1-L L | 5        | 5  | 5  | 40 | 5  | 150 | 65 | 0.0  | 7.7 | 18.2 | 26.2 | 10902 | 0.3 | 23.1             |
| galwc05-1-L H | 5        | 5  | 5  | 40 | 5  | 150 | 65 | 0.0  | 7.8 | 14.7 | 22.8 | 10769 | 0.7 | 27.3             |
| galwc05-1-H L | 5        | 5  | 5  | 40 | 5  | 150 | 65 | 0.0  | 7.6 | 16.9 | 24.8 | 10658 | 0.2 | 18.8             |
| galwc05-1-H H | 5        | 5  | 5  | 40 | 5  | 150 | 65 | 0.0  | 8.2 | 23.8 | 32.2 | 10861 | 1.5 | 31.7             |
| galwc05-2-L L | 5        | 10 | 5  | 25 | 10 | 150 | 65 | 1.2  | 2.6 | 22.7 | 25.7 | 13286 | 3.0 | 31.1             |
| galwc05-2-L H | 5        | 10 | 5  | 25 | 10 | 150 | 65 | 1.1  | 2.6 | 15.1 | 18.1 | 13426 | 2.1 | 21.6             |
| galwc05-2-H L | 5        | 10 | 5  | 25 | 10 | 150 | 65 | 2.0  | 2.6 | 23.6 | 26.5 | 13463 | 3.8 | 64.0             |
| galwc05-2-H H | 5        | 10 | 5  | 25 | 10 | 150 | 65 | 1.1  | 2.7 | 29.0 | 32.0 | 13753 | 4.1 | 37.8             |
| galwc05-3-L L | 10       | 5  | 5  | 25 | 5  | 150 | 65 | 0.0  | 2.6 | 5.8  | 8.7  | 4752  | 0.0 | 8.9              |
| galwc05-3-L H | 10       | 5  | 5  | 25 | 5  | 150 | 65 | 0.0  | 2.7 | 6.6  | 9.6  | 4886  | 1.8 | 10.6             |
| galwc05-3-H L | 10       | 5  | 5  | 25 | 5  | 150 | 65 | 0.0  | 2.6 | 7.5  | 10.4 | 5037  | 0.0 | 9.0              |
| galwc05-3-H H | 10       | 5  | 5  | 25 | 5  | 150 | 65 | 0.0  | 2.6 | 8.0  | 10.9 | 4861  | 2.1 | 12.4             |
| galwc05-4-L L | 5        | 5  | 10 | 25 | 5  | 150 | 65 | 0.0  | 2.6 | 7.7  | 10.6 | 6936  | 0.0 | 9.0              |
| galwc05-4-L H | 5        | 5  | 10 | 25 | 5  | 150 | 65 | 0.0  | 2.6 | 16.0 | 18.9 | 7048  | 3.1 | 11.5             |
| galwc05-4-H L | 5        | 5  | 10 | 25 | 5  | 150 | 65 | 0.0  | 2.6 | 19.9 | 22.9 | 7175  | 0.4 | 9.9              |
| galwc05-4-H H | 5        | 5  | 10 | 25 | 5  | 150 | 65 | 0.0  | 2.6 | 13.6 | 16.6 | 7354  | 4.1 | 9.7              |

Table 15 Result of GALW and the hybrid method on all the instances of collections galwc04 and galwc05.

| Instance      | Features |    |    |    |    |    |    | GALW |      |        |        |       | Hybrid(Y)<br>T/% |         |
|---------------|----------|----|----|----|----|----|----|------|------|--------|--------|-------|------------------|---------|
|               | K        | U  | L  | D  | N  | q  | M  | s    | r    | a/%    | t      | #ps   |                  | %Y      |
| galwc06-0-L L | 5        | 5  | 10 | 50 | 5  | 70 | 50 | 0.0  | 9.2  | 11.2   | 20.7   | 6350  | 0.5              | 20.1    |
| galwc06-0-L H | 5        | 5  | 10 | 50 | 5  | 70 | 50 | 0.0  | 9.4  | 6.3    | 16.1   | 6424  | 1.3              | 19.6    |
| galwc06-0-H L | 5        | 5  | 10 | 50 | 5  | 70 | 50 | 0.0  | 9.7  | 8.9    | 19.0   | 6386  | 6.1              | 15.2    |
| galwc06-0-H H | 5        | 5  | 10 | 50 | 5  | 70 | 50 | 0.0  | 9.5  | 8.1    | 18.0   | 6373  | 1.8              | 20.8    |
| galwc06-1-L L | 5        | 5  | 10 | 80 | 5  | 70 | 50 | 0.0  | 28.1 | 31.1   | 59.7   | 16593 | 0.7              | 271.0   |
| galwc06-1-L H | 5        | 5  | 10 | 80 | 5  | 70 | 50 | 0.0  | 26.6 | 29.6   | 56.8   | 16697 | 1.8              | 89.3    |
| galwc06-1-H L | 5        | 5  | 10 | 80 | 5  | 70 | 50 | 0.0  | 27.1 | 28.9   | 56.6   | 16500 | 5.2              | 249.7   |
| galwc06-1-H H | 5        | 5  | 10 | 80 | 5  | 70 | 50 | 0.0  | 27.1 | 76.2   | 103.8  | 16611 | 1.2              | 109.1   |
| galwc06-2-L L | 5        | 10 | 10 | 50 | 10 | 70 | 50 | 1.6  | 7.3  | 56.5   | 64.2   | 15019 | 0.0              | 69.8    |
| galwc06-2-L H | 5        | 10 | 10 | 50 | 10 | 70 | 50 | 1.1  | 7.0  | 43.0   | 50.4   | 14599 | 0.5              | 159.7   |
| galwc06-2-H L | 5        | 10 | 10 | 50 | 10 | 70 | 50 | 1.9  | 7.1  | 104.6  | 112.1  | 14973 | 1.9              | 168.4   |
| galwc06-2-H H | 5        | 10 | 10 | 50 | 10 | 70 | 50 | 1.1  | 7.2  | 54.4   | 62.0   | 14959 | 1.4              | 137.4   |
| galwc06-3-L L | 10       | 5  | 10 | 50 | 5  | 70 | 50 | 0.0  | 9.6  | 11.6   | 21.6   | 6412  | 0.1              | 16.9    |
| galwc06-3-L H | 10       | 5  | 10 | 50 | 5  | 70 | 50 | 0.0  | 9.8  | 11.3   | 21.5   | 6386  | 1.0              | 20.1    |
| galwc06-3-H L | 10       | 5  | 10 | 50 | 5  | 70 | 50 | 0.0  | 10.2 | 11.4   | 22.0   | 6355  | 5.7              | 19.5    |
| galwc06-3-H H | 10       | 5  | 10 | 50 | 5  | 70 | 50 | 0.0  | 9.2  | 6.7    | 16.4   | 6296  | 0.8              | 17.3    |
| galwc06-4-L L | 5        | 5  | 15 | 50 | 5  | 70 | 50 | 0.0  | 9.0  | 13.2   | 22.7   | 9334  | 0.5              | 21.0    |
| galwc06-4-L H | 5        | 5  | 15 | 50 | 5  | 70 | 50 | 0.0  | 9.3  | 13.7   | 23.4   | 9225  | 1.8              | 36.8    |
| galwc06-4-H L | 5        | 5  | 15 | 50 | 5  | 70 | 50 | 0.0  | 8.8  | 14.1   | 23.4   | 9261  | 3.7              | 22.1    |
| galwc06-4-H H | 5        | 5  | 15 | 50 | 5  | 70 | 50 | 0.0  | 9.0  | 22.3   | 31.7   | 9416  | 0.7              | 31.6    |
| galwc07-0-L L | 5        | 5  | 10 | 50 | 5  | 70 | 50 | 0.0  | 7.7  | 17.1   | 25.2   | 10814 | 0.0              | 18.0    |
| galwc07-0-L H | 5        | 5  | 10 | 50 | 5  | 70 | 50 | 0.0  | 7.8  | 16.0   | 24.1   | 10647 | 3.2              | 23.3    |
| galwc07-0-H L | 5        | 5  | 10 | 50 | 5  | 70 | 50 | 0.0  | 7.7  | 26.5   | 34.6   | 10820 | 0.5              | 42.2    |
| galwc07-0-H H | 5        | 5  | 10 | 50 | 5  | 70 | 50 | 0.0  | 7.9  | 15.2   | 23.5   | 11015 | 0.9              | 39.0    |
| galwc07-1-L L | 5        | 5  | 10 | 80 | 5  | 70 | 50 | 0.0  | 24.0 | 106.7  | 131.2  | 28020 | 0.6              | 768.3   |
| galwc07-1-L H | 5        | 5  | 10 | 80 | 5  | 70 | 50 | 0.0  | 23.9 | 262.9  | 287.2  | 27891 | 2.3              | 170.9   |
| galwc07-1-H L | 5        | 5  | 10 | 80 | 5  | 70 | 50 | 0.0  | 25.9 | 71.7   | 98.1   | 28246 | 1.3              | 771.6   |
| galwc07-1-H H | 5        | 5  | 10 | 80 | 5  | 70 | 50 | 0.0  | 25.4 | 64.3   | 90.3   | 28832 | 3.0              | 400.2   |
| galwc07-2-L L | 5        | 10 | 10 | 50 | 10 | 70 | 50 | 1.4  | 6.8  | 242.9  | 250.1  | 26212 | 0.2              | 281.1   |
| galwc07-2-L H | 5        | 10 | 10 | 50 | 10 | 70 | 50 | 1.1  | 7.0  | 261.3  | 268.7  | 25931 | 3.4              | 161.5   |
| galwc07-2-H L | 5        | 10 | 10 | 50 | 10 | 70 | 50 | 1.5  | 6.6  | 463.3  | 470.2  | 26003 | 0.4              | 294.0   |
| galwc07-2-H H | 5        | 10 | 10 | 50 | 10 | 70 | 50 | 1.5  | 6.7  | 837.9  | 845.0  | 25450 | 2.7              | 583.1   |
| galwc07-3-L L | 10       | 5  | 10 | 50 | 5  | 70 | 50 | 0.0  | 8.2  | 31.0   | 39.7   | 10912 | 0.2              | 55.7    |
| galwc07-3-L H | 10       | 5  | 10 | 50 | 5  | 70 | 50 | 0.0  | 7.9  | 17.1   | 25.5   | 11028 | 1.5              | 36.2    |
| galwc07-3-H L | 10       | 5  | 10 | 50 | 5  | 70 | 50 | 0.0  | 7.7  | 19.1   | 27.2   | 10952 | 0.0              | 26.1    |
| galwc07-3-H H | 10       | 5  | 10 | 50 | 5  | 70 | 50 | 0.0  | 7.8  | 15.8   | 24.0   | 10813 | 1.2              | 32.9    |
| galwc07-4-L L | 5        | 5  | 15 | 50 | 5  | 70 | 50 | 0.0  | 7.8  | 19.5   | 27.7   | 13963 | 0.1              | 23.8    |
| galwc07-4-L H | 5        | 5  | 15 | 50 | 5  | 70 | 50 | 0.0  | 7.6  | 34.6   | 42.6   | 13762 | 2.5              | 48.1    |
| galwc07-4-H L | 5        | 5  | 15 | 50 | 5  | 70 | 50 | 0.0  | 7.6  | 20.0   | 28.0   | 13641 | 0.0              | 34.0    |
| galwc07-4-H H | 5        | 5  | 15 | 50 | 5  | 70 | 50 | 0.0  | 7.9  | 56.7   | 65.0   | 14032 | 1.2              | 30.4    |
| galwc08-0-L L | 5        | 10 | 10 | 50 | 10 | 70 | 50 | 1.4  | 7.9  | 466.4  | 474.8  | 14835 | 2.0              | 2681.4  |
| galwc08-0-L H | 5        | 10 | 10 | 50 | 10 | 70 | 50 | 1.8  | 8.0  | 514.2  | 522.7  | 14663 | 3.1              | (0.6%)  |
| galwc08-0-H L | 5        | 10 | 10 | 50 | 10 | 70 | 50 | 1.1  | 8.1  | 414.7  | 423.1  | 14671 | 2.6              | 3211.2  |
| galwc08-0-H H | 5        | 10 | 10 | 50 | 10 | 70 | 50 | 1.1  | 8.0  | 548.9  | 557.3  | 14532 | 2.6              | 1628.3  |
| galwc08-1-L L | 5        | 10 | 10 | 80 | 10 | 70 | 50 | 1.1  | 21.6 | 476.7  | 499.0  | 36996 | -∞               | (+∞)    |
| galwc08-1-L H | 5        | 10 | 10 | 80 | 10 | 70 | 50 | 1.1  | 22.3 | (3.5%) | 3636.1 | 36457 | -8.0             | (15.8%) |
| galwc08-1-H L | 5        | 10 | 10 | 80 | 10 | 70 | 50 | 1.4  | 21.7 | (3.8%) | 3635.5 | 36861 | -4.3             | (11.4%) |
| galwc08-1-H H | 5        | 10 | 10 | 80 | 10 | 70 | 50 | 1.6  | 22.7 | (6.0%) | 3651.0 | 37080 | -8.3             | (15.3%) |
| galwc08-2-L L | 5        | 15 | 10 | 50 | 15 | 70 | 50 | 69.7 | 8.1  | 612.8  | 621.3  | 27451 | -18.6            | (28.9%) |
| galwc08-2-L H | 5        | 15 | 10 | 50 | 15 | 70 | 50 | 70.2 | 8.3  | 1563.2 | 1571.9 | 27986 | -∞               | (+∞)    |
| galwc08-2-H L | 5        | 15 | 10 | 50 | 15 | 70 | 50 | 68.7 | 8.2  | 2482.2 | 2490.9 | 27455 | -∞               | (+∞)    |
| galwc08-2-H H | 5        | 15 | 10 | 50 | 15 | 70 | 50 | 68.4 | 8.3  | 3335.4 | 3344.2 | 27629 | -∞               | (+∞)    |
| galwc08-3-L L | 10       | 10 | 10 | 50 | 10 | 70 | 50 | 1.1  | 8.3  | 834.0  | 842.8  | 14691 | -0.1             | (2.0%)  |
| galwc08-3-L H | 10       | 10 | 10 | 50 | 10 | 70 | 50 | 1.1  | 8.0  | 236.5  | 245.0  | 14532 | 22.9             | (3.6%)  |
| galwc08-3-H L | 10       | 10 | 10 | 50 | 10 | 70 | 50 | 1.3  | 8.0  | 679.2  | 687.6  | 14513 | 2.7              | (2.9%)  |
| galwc08-3-H H | 10       | 10 | 10 | 50 | 10 | 70 | 50 | 1.1  | 8.0  | 474.8  | 483.4  | 14495 | 22.0             | (6.7%)  |
| galwc08-4-L L | 5        | 10 | 15 | 50 | 10 | 70 | 50 | 1.2  | 7.6  | 391.6  | 399.7  | 19571 | 5.8              | 879.2   |
| galwc08-4-L H | 5        | 10 | 15 | 50 | 10 | 70 | 50 | 1.1  | 8.0  | 1240.5 | 1248.9 | 19519 | 0.9              | (6.0%)  |
| galwc08-4-H L | 5        | 10 | 15 | 50 | 10 | 70 | 50 | 1.1  | 7.5  | 381.2  | 389.2  | 20048 | 5.8              | 1705.0  |
| galwc08-4-H H | 5        | 10 | 15 | 50 | 10 | 70 | 50 | 1.1  | 7.5  | 310.6  | 318.5  | 19612 | 4.1              | (0.4%)  |

Table 16 Result of GALW and the hybrid method on all the instances of collections galwc06, galwc07 and galwc08.
